# Supplementary material
Source: MDPI journal article supplement (https://www.mdpi.com/2571-8789/6/2/36)
Supplement: s1 [file s1]

Please set your working directory to this folder.

**To repeat the explorative regressions in this study, open and run the following R scripts in the specified order:**

1. `bestmodels_R2CV.R` (a function for finding the best models according to  $R^2$  and cross validated root-mean-squared-error)
2. `bestmodels_R2CV_details.R` (a function for extracting model information, e.g. coefficients, intercepts, p values etc., from best models)
3. `calcLMG` (by Micheal Simmler).R (a function for calculating the weight or the relative contribution of each model variable to the  $R^2$  in multivariate models)
4. `field survey regr_As_R_3+1 sets.R` (Explorative regression for grain As; This may take one to several hours depending on the computer processors)
5. `field survey regr_Cd_R_3+1 sets.R` (Explorative regression for grain Cd; This may take one to several hours depending on the computer processors)

**To regenerate plots in this study, open and run the following R scripts in the specified order:**

1. `calcLMG` (by Micheal Simmler).R
2. `field survey plots.R`

The produced plots can be found in the same folder as your working directory.
